# Supplementary material
Source: PubMed Central journal article supplement (PMC3174754)

Figure S1

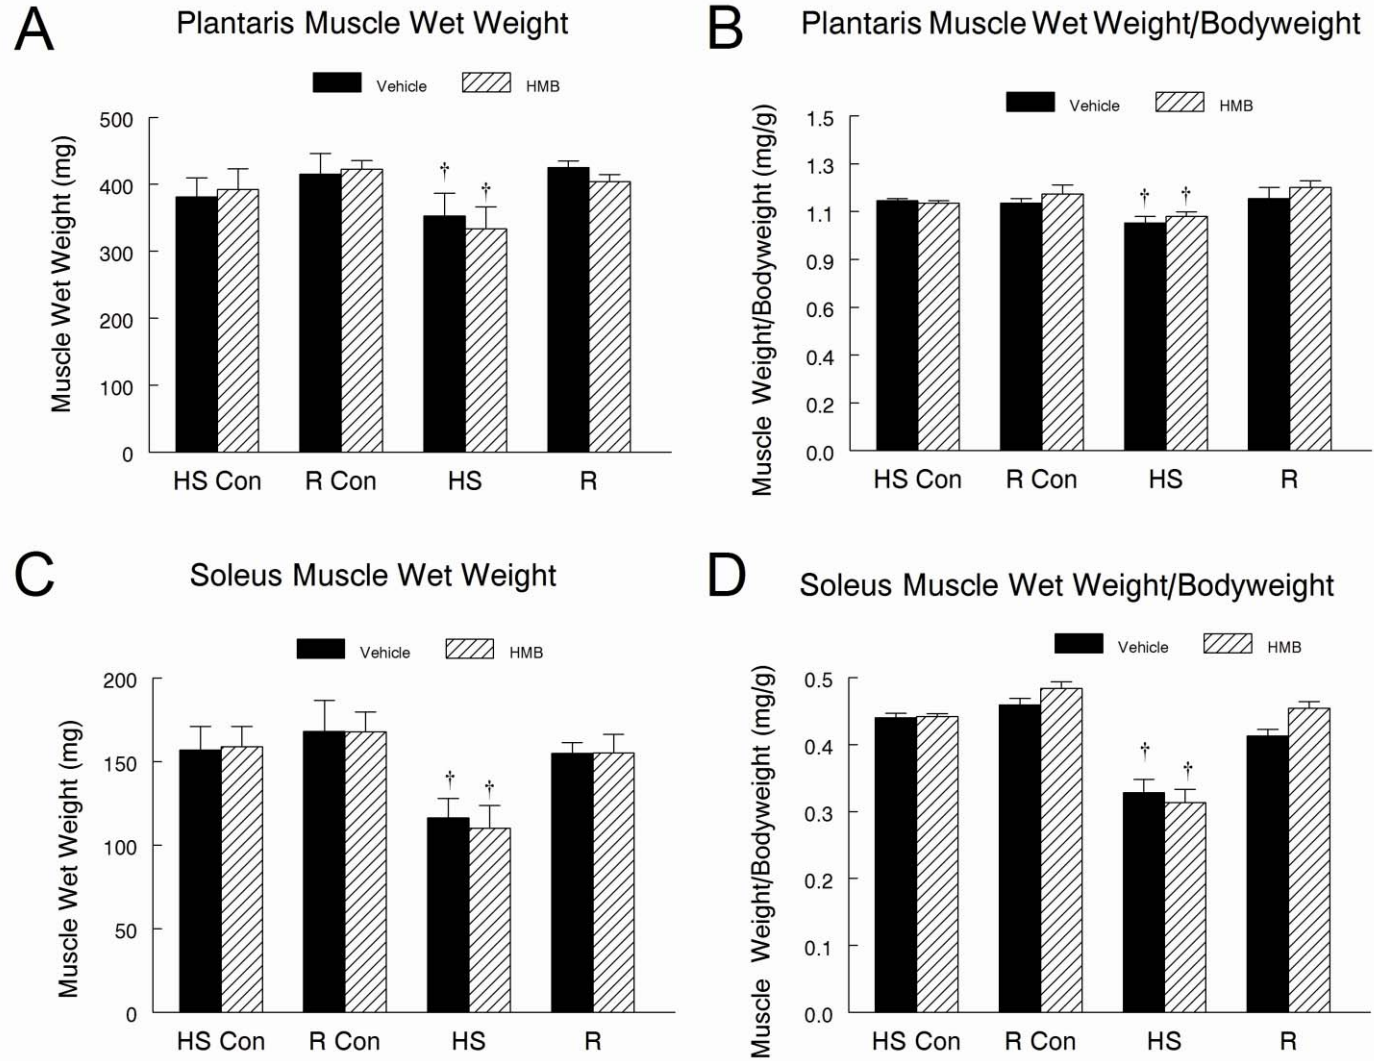

# Figure S2

**A** TUNEL Positive Nuclei in the Plantaris Muscle

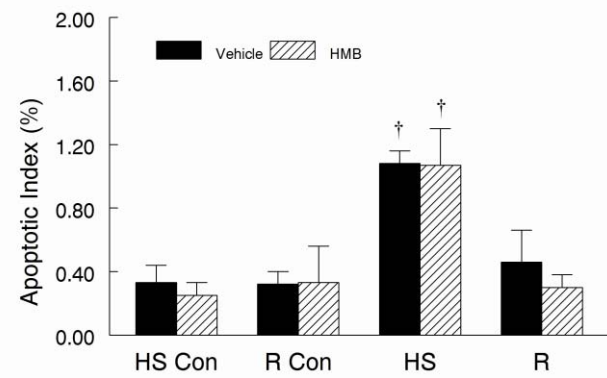

**B** TUNEL Positive Nuclei in the Soleus Muscle

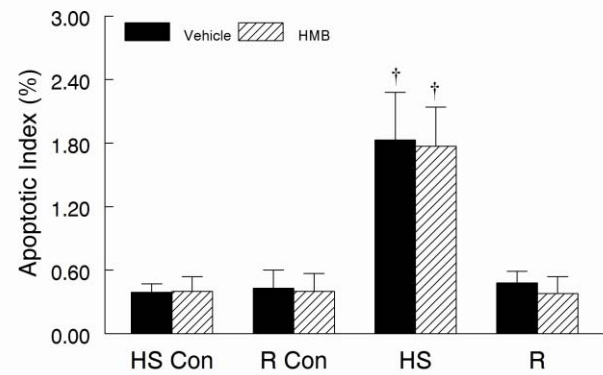

# Figure S3

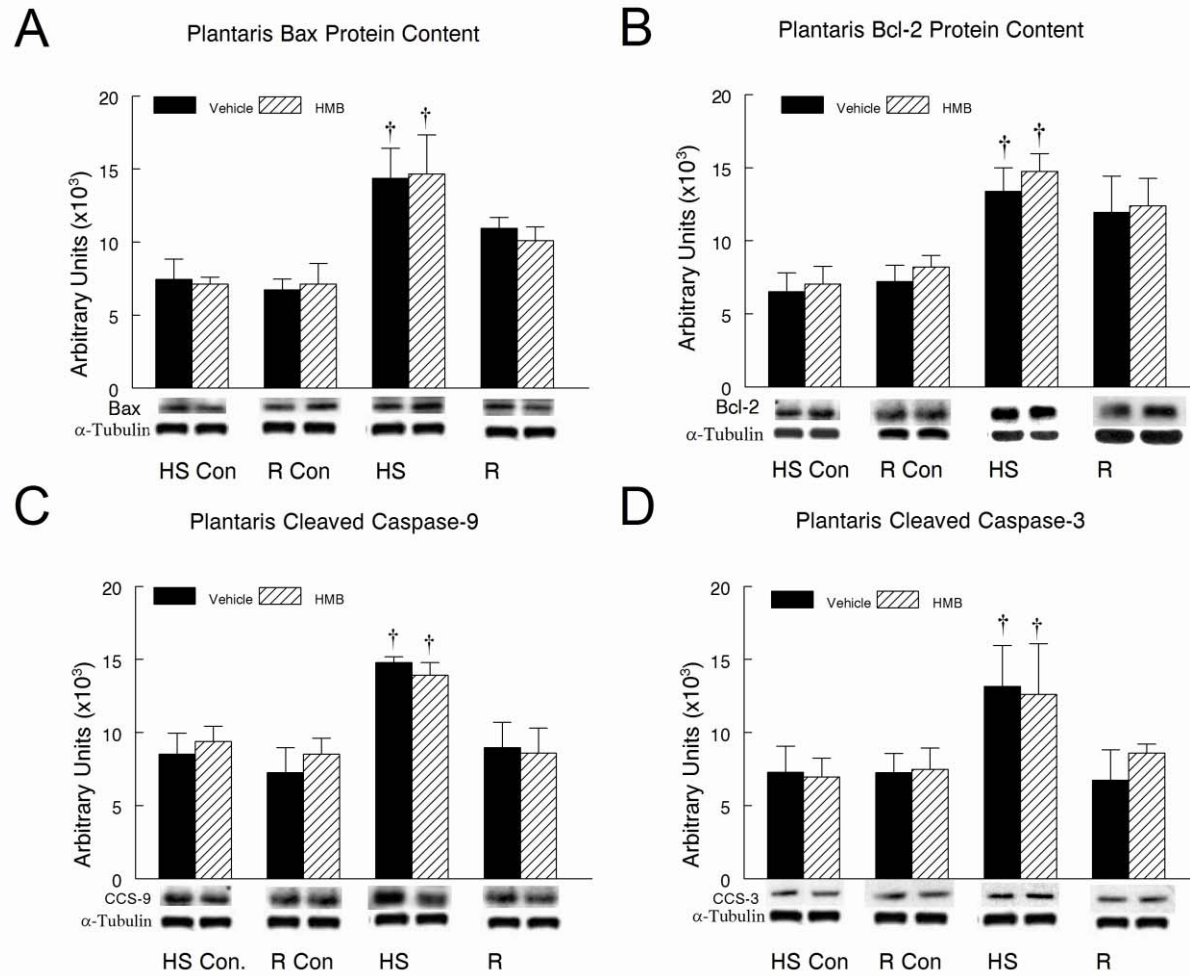

# Figure S4

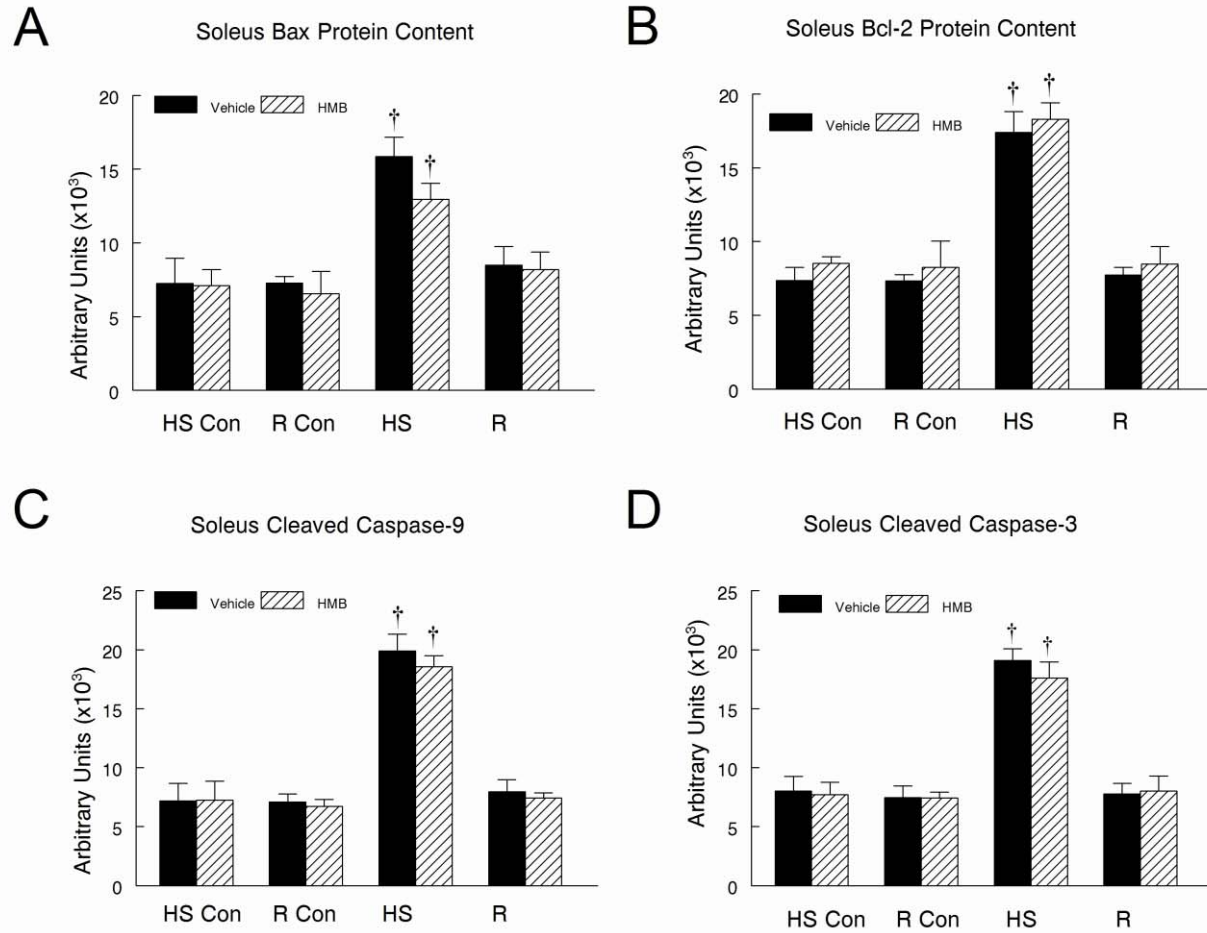

Supplement: supp_00840.2010_figS1.pdf [file supp_00840.2010_figS1.pdf]
