# Supplementary material
Source: PubMed Central journal article supplement (PMC3174754)
Supplement: supp_00840.2010_tableS1.pdf [file supp_00840.2010_tableS1.pdf]

**Supplemental Table S1**

**Body weight for aged rats**

|                    | 14 Days (HS) |            |              |              | 28 Days (HS+Recovery) |            |            |            |
|--------------------|--------------|------------|--------------|--------------|-----------------------|------------|------------|------------|
|                    | CC-Veh       | CC-HMB     | Vehicle      | HMB          | CC-Veh                | CC-HMB     | Vehicle    | HMB        |
|                    | n=8          | n=8        | n=8          | n=12         | n=7                   | n=7        | n=7        | n=11       |
| Time 0             | 554.9 ± 16.9 | 556.5±21.2 | 558.5 ± 21.6 | 552.9 ± 30.3 | 548.6±35.1            | 549.5±19.2 | 532.9±43.8 | 539.4±30.8 |
| 14 days (HS)       | 529.6 ± 15.4 | 538.8±22.7 | 473.3 ± 20.5 | 486.0 ± 32.6 | 533.0±30.0            | 536.8±20.8 | 451.3±39.9 | 476.2±27.2 |
| 28 days (Recovery) | N/A          | N/A        | N/A          | N/A          | 513.8±35.4            | 521.5±19.3 | 423.5±50.9 | 455.5±33.6 |

**Supplemental Table S2**

**Isometric Force/Bodyweight for aged Rats**

|                    | 14 Days (HS) |             |             |             | 28 Days (HS+Recovery) |              |             |             |
|--------------------|--------------|-------------|-------------|-------------|-----------------------|--------------|-------------|-------------|
|                    | CC-Veh       | CC-HMB      | Vehicle     | HMB         | CC-Veh                | CC-HMB       | Vehicle     | HMB         |
|                    | n=8          | n=8         | n=8         | n=12        | n=7                   | n=7          | n=7         | n=11        |
| Time 0             | 1.84 ± 0.06  | 1.85 ± 0.04 | 1.83 ± 0.04 | 1.87 ± 0.06 | 1.85 ± 0.09           | 1.85 ± 0.04  | 1.80 ± 0.09 | 1.84 ± 0.10 |
| 14 days (HS)       | 1.79 ± 0.08  | 1.77 ± 0.09 | 1.23 ± 0.13 | 1.61 ± 0.07 | 1.76 ± 0.08           | 1.75 ± 0.08  | 1.27 ± 0.10 | 1.53 ± 0.08 |
| 28 days (Recovery) | N/A          | N/A         | N/A         | N/A         | 1.84 ± 0.1            | 1.714 ± 0.06 | 1.12 ± 0.08 | 1.44 ± 0.07 |

**Supplemental Table S3**

**Gastrocnemius muscle wet weight for aged rats**

**14 Days (HS)**

Control HS

**28 Days (HS+Recovery)**

Control Recovery

---

|              | (n=9)       | (n=7)       | (n=7)       | (n=11)      |
|--------------|-------------|-------------|-------------|-------------|
| CCon-Veh (g) | 1.33 ± 0.17 | 1.33 ± 0.15 | 1.31 ± 0.06 | 1.32 ± 0.07 |
| CCon-HMB (g) | 1.29 ± 0.20 | 1.34 ± 0.12 | 1.32 ± 0.13 | 1.33 ± 0.08 |
| Vehicle (g)  | 1.31 ± 0.11 | 1.09 ± 0.19 | 1.39 ± 0.07 | 1.11 ± 0.17 |
| HMB (g)      | 1.32 ± 0.09 | 1.13 ± 0.06 | 1.36 ± 0.06 | 1.22 ± 0.13 |

### Supplemental Table S4

#### Effect of HMB on Body Weight of Young FBN Rats

| Group   | n | Body Weight  |                           |               |
|---------|---|--------------|---------------------------|---------------|
|         |   | Time 0       | 14d HS                    | Recovery      |
| CC-Veh. | 6 | 371.2 ± 15.8 | 372.2 ± 13.2              | 370.8 ± 11.2  |
| CC-HMB  | 6 | 368.0 ± 22.7 | 371.3 ± 19.9              | 367.3 ± 23.6  |
| Vehicle | 6 | 380.0 ± 20.3 | 330.0 ± 13.3 <sup>§</sup> | 361.8 ± 21.2* |
| HMB     | 6 | 362.2 ± 22.7 | 320.5 ± 23.7 <sup>§</sup> | 347.2 ± 17.8* |

**Supplemental Table S5**

**Effect of HMB on Isometric Force of Young FBN Rats**

| Group   | Isometric Force/Bodyweight (N/kg) |            |            |            |
|---------|-----------------------------------|------------|------------|------------|
|         | n                                 | Time 0     | 14d HS     | Recovery   |
| CC-Veh  | 6                                 | 39.3 ± 3.5 | 39.3 ± 1.1 | 39.2 ± 2.6 |
| CC-HMB  | 6                                 | 42.9 ± 2.5 | 40.2 ± 4.8 | 43.2 ± 4.8 |
| Vehicle | 6                                 | 40.5 ± 5.2 | 37.1 ± 5.5 | 37.4 ± 1.4 |
| HMB     | 6                                 | 43.8 ± 4.4 | 34.3 ± 3.5 | 37.8 ± 7.3 |
